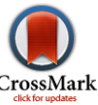

# Hyaluronic Acid-Modified Magnetic Iron Oxide Nanoparticles for MR Imaging of Surgically Induced Endometriosis Model in Rats

He Zhang<sup>1</sup>\*, Jingchao Li<sup>2</sup>\*, Wenjie Sun<sup>2</sup>, Yong Hu<sup>2</sup>, Guofu Zhang<sup>1\*</sup>, Mingwu Shen<sup>2\*</sup>, Xiangyang Shi<sup>2\*</sup>

**1** Department of Radiology, Obstetrics and Gynecology Hospital, Fudan University, Shanghai, PR China, **2** College of Chemistry, Chemical Engineering and Biotechnology, Donghua University, Shanghai, PR China

## Abstract

Endometriosis is defined as the presence of endometrial tissue outside the uterine, which may affect nearly 60% of women in reproductive age. Deep infiltrating endometriosis (DIE) defined as an endometriotic lesion penetrating into the retroperitoneal space or the wall of the pelvic organs to a depth of at least 5 mm represents the most diagnostic challenge. Herein, we reported the use of hyaluronic acid (HA)-modified magnetic iron oxide nanoparticles (HA-Fe<sub>3</sub>O<sub>4</sub> NPs) for magnetic resonance (MR) imaging of endometriotic lesions in the rodent model. Sixteen endometriotic lesions were surgically induced in eight rats by autologous transplantation. Four weeks after lesion induction, three rats were scanned *via* MR imaging after tail vein injection of the HA-Fe<sub>3</sub>O<sub>4</sub> NPs. Accordingly, the remaining five mice were sacrificed in the corresponding time points. The ectopic uterine tissues (EUTs) were confirmed by histological analysis. Quantification of Fe in the EUT was also performed by inductively coupled plasma-optical emission spectroscopy. Our results showed that by using the HA-Fe<sub>3</sub>O<sub>4</sub> NPs, the EUTs were able to be visualized *via* T<sub>2</sub>-weighted MR imaging at 2 hours post injection, corroborating the Prussian blue staining results. The developed HA-Fe<sub>3</sub>O<sub>4</sub> NPs could be used as negative contrast agents for sensitively detecting endometriosis in a mouse model and may be applied for future hyperthermia treatment of endometriosis.

**Citation:** Zhang H, Li J, Sun W, Hu Y, Zhang G, et al. (2014) Hyaluronic Acid-Modified Magnetic Iron Oxide Nanoparticles for MR Imaging of Surgically Induced Endometriosis Model in Rats. PLoS ONE 9(4): e94718. doi:10.1371/journal.pone.0094718

**Editor:** Bing Xu, Brandeis University, United States of America

**Received:** February 11, 2014; **Accepted:** March 18, 2014; **Published:** April 10, 2014

**Copyright:** © 2014 Zhang et al. This is an open-access article distributed under the terms of the Creative Commons Attribution License, which permits unrestricted use, distribution, and reproduction in any medium, provided the original author and source are credited.

**Funding:** The authors have no support or funding to report.

**Competing Interests:** The authors have declared that no competing interests exist.

\* E-mail: guofuzh@msn.com (GZ); mwshen@dhu.edu.cn (MS); xshi@dhu.edu.cn (XS)

† These authors contributed equally to this work.

## Introduction

Endometriosis is defined as the presence of endometrial tissue outside the endometrium and the myometrium, which may affect nearly 60% of women in reproductive age [1]. Till now, the true mechanism of etiology, pathophysiology, and progression in endometriosis still remains unclear [2]. Deep infiltrating endometriosis (DIE) is defined as an endometriotic lesion penetrating into the retroperitoneal space or the wall of the pelvic organs to a depth of at least 5 mm [3]. Some locations including the posterior fornix, uterosacral ligaments, rectum, vagina, and bladder can be affected by DIE lesions. In this condition, accurately preoperative evaluation of both presence and extension of disease may be helpful for the selection of complete surgical excision.

With the advantages of superb tissue contrast resolution and no ionizing radiation, magnetic resonance (MR) imaging is generally performed for problem solving in determining the etiology of indeterminate sonographic lesions in the female genital tract [4–8]. It is well known that the typical MR findings of endometriosis are hyper intensity on both T<sub>1</sub> and T<sub>2</sub> weighted image (T<sub>1</sub>WI/T<sub>2</sub>WI) as a result of hemorrhagic components associated with menstrual bleeding [9]. For diagnosis of DIE, some lesions may be overlooked on both non-contrast and contrast enhanced MR images for on one hand the lesions often occupy the deep aspects of pelvic organs and on the other hand, the small lesion size as well

as atypical signal character usually make it difficult to be differentiated from adjacent normal tissues [10,11].

Nowadays, the most common commercially available MR contrast agent is T<sub>1</sub> agent (Gd/chelator complexes) used in clinical settings for cancer diagnosis [12]. However, with respect to endometriosis diagnosis, the application of T<sub>1</sub> agent provides limited information due to the mild enhancement of lesions that may be largely shaded by hyperintensity on both T<sub>1</sub>WI and T<sub>2</sub>WI images. Therefore, it is reasonable to speculate that T<sub>2</sub>-negative contrast agents may be able to improve the detection rate of small lesions as a result of the increased lesion to background contrast. In recent years, magnetic iron oxide nanoparticles (Fe<sub>3</sub>O<sub>4</sub> NPs) have gained increasing attention in various biomedical applications [13], especially in cancer MR imaging owing to their high r<sub>2</sub> relaxivity [14–20]. However, to our best knowledge, to image the endometriosis using the Fe<sub>3</sub>O<sub>4</sub> NPs using MR imaging has not been reported.

In our previous work [21], we have successfully synthesized hyaluronic acid (HA)-modified Fe<sub>3</sub>O<sub>4</sub> NPs (HA-Fe<sub>3</sub>O<sub>4</sub> NPs) that can be used as negative contrast agents for MR imaging of cancer cells overexpressing CD44 receptors. It is known that, HA is a member of the glycosaminoglycan family composed of repeating disaccharide units of D-glucuronic acid and N-acetyl-D-glucosamine and has been expanded into various biomedical applications due to its biocompatibility, biodegradability and non-

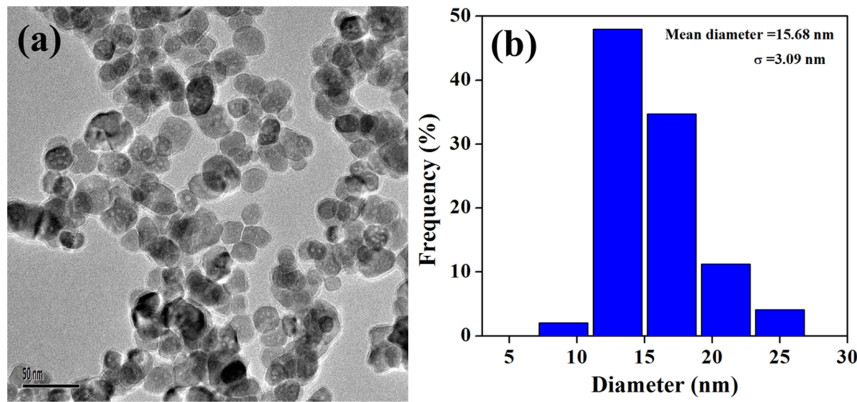

**Figure 1. The morphology and the size distribution histograms of the HA-Fe<sub>3</sub>O<sub>4</sub> NPs characterized by TEM.**

doi:10.1371/journal.pone.0094718.g001

immunogenicity. What's more, the hydrothermally synthesized Fe<sub>3</sub>O<sub>4</sub> NPs show good water solubility, colloid stability and biocompatibility after being modified by HA. So it may be a very meaningful attempt to detect the endometriosis by using the HA-modified Fe<sub>3</sub>O<sub>4</sub> NPs as contrast agents.

In this study, we reported our initial results with HA-Fe<sub>3</sub>O<sub>4</sub> NPs in *in vivo* imaging of endometriotic lesions in rats. The morphology of the HA-Fe<sub>3</sub>O<sub>4</sub> NPs was firstly confirmed *via* transmission electron microscopy (TEM) imaging. Subsequently, the HA-Fe<sub>3</sub>O<sub>4</sub> NPs were used for MR imaging of experimentally induced endometriotic lesions in rats.

## Materials and Methods

### Synthesis and characterization techniques

The HA (Mw = 5,805)-modified Fe<sub>3</sub>O<sub>4</sub> NPs (HA-Fe<sub>3</sub>O<sub>4</sub> NPs) were synthesized and characterized according to our previous protocol [21]. A JEOL 2010F analytical electron microscope (JEOL, Tokyo, Japan) was used to characterize the morphology of the HA-Fe<sub>3</sub>O<sub>4</sub> NPs at an operating voltage of 200 kV. The sample was dispersed in ethanol. A dilute particle suspension (10 μL) of the sample was then deposited onto a carbon-coated copper grid and dried in air before measurements. The Fe content in the particle suspension and induced endometriotic lesions was measured by using a Leeman Prodigy inductively coupled plasma-optical emission spectroscopy (ICP-OES, Hudson, NH, USA). The effect of MR imaging for HA-Fe<sub>3</sub>O<sub>4</sub> NPs was evaluated at 3.0 Tesla MR imaging machine (Siemens, Erlangen, Germany). Samples were diluted with water to have an Fe concentration in the range of 0.28–8.96 μg/mL before measurements. The instrumental parameters were set as follows: point

resolution = 156 mm×156 mm, section thickness = 1.5 mm, TR = 4960 ms, TE = 85 ms, and number of excitation = 1.

### Animal models

Animal experiments were carried out according to protocols approved by our institutional committee (obstetrics and gynecology hospital, Fudan University) for animal care and also in accordance with the policy of the National Ministry of Health.

Female Sprague-Dawley rats (200–240 g, Shanghai Slac Laboratory Animal Center, Shanghai, China) were used. Eight rats were anesthetized by intraperitoneal injection of pentobarbital sodium (30 mg/kg). The abdomen was shaved and disinfected with a 75% alcohol solution before covering with sterile drapes. A midline open surgery was performed 1 cm cephalad to the symphysis pubis with a 2–3 cm vertical incision. After exposing both uterine horns, the left uterine horn ligated proximally and distally with 5×0 sutures and then a segment 1.0 cm in length was resected and placed in phosphate buffered saline (PBS) at 37°C. The cutting uterine horn was trimmed to remove excess fat and endometrium was carefully striped and split longitudinally into two segments of rectangles (3×15 mm). Each of endometrium segment was fixed using two 5×0 sutures to the peritoneal side of bilateral abdominal wall 1 cm apart from the incision with the endoluminal side facing abdomen. Lastly, the abdomen was closed layer by layer with a running 5×0 suture for peritoneum and musculature, and 4–0 nylon sutures for the skin.

### *In vivo* MR imaging

A 3.0 Tesla MR scanner (Siemens, Erlangen, Germany) was used with a custom-built rodent receiver coil (Chenguang Med

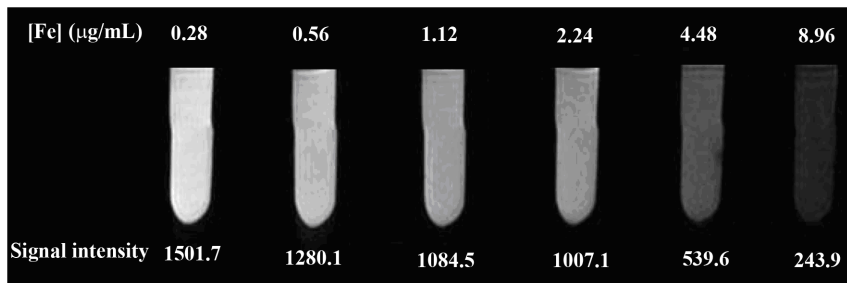

**Figure 2. The T<sub>2</sub>-weighted MR images and signal intensity of the HA-Fe<sub>3</sub>O<sub>4</sub> NPs at different Fe concentrations.**

doi:10.1371/journal.pone.0094718.g002

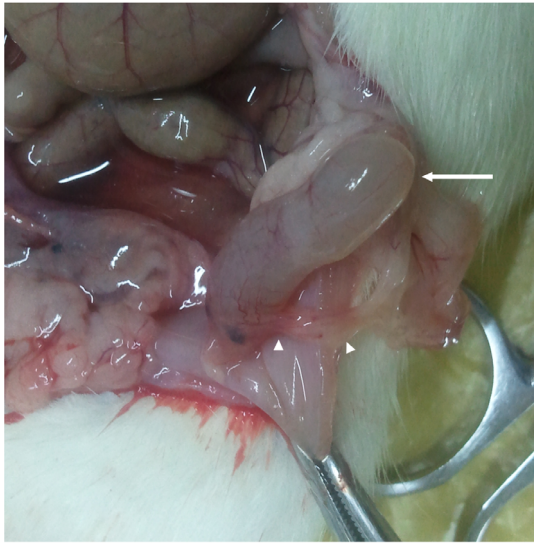

**Figure 3. The surgically induced ectopic endometriotic lesions at four weeks post operation.** The tubal cystic structure with a size of 23.8×4.7×3.9 mm was noticed at the fixed site (long arrow). The ectopic lesions were full of liquids and the small dendritic vessels on the surface of the wall were also clearly observed. Note that a strip of the adhesion tissues (arrowhead) was also observed between the ectopic lesions and abdominal wall.  
doi:10.1371/journal.pone.0094718.g003

Tech, Shanghai, China). Axial turbo spin echo fat-suppressed(FS) T<sub>2</sub>WI were obtained with a bandwidth of 203 Hz, slice thickness of 1.5 mm, Repetition Time (TR)/Echo Time(TE) of 4690/85 ms, FOV of 60×60 mm, matrix of 256×256, and a voxel size of 0.2×0.2×1.5 mm<sup>3</sup>. The total acquisition time was about 3.5 min. Four weeks after surgery, the experimental mice (n=3) were intravenously injected with HA-Fe<sub>3</sub>O<sub>4</sub> NPs *via* the tail vein, anesthetized with pentobarbital sodium (30 mg/kg), and followed by static MR scanning. MR images were obtained both before and after administration of the HA-Fe<sub>3</sub>O<sub>4</sub> NPs (Fe mass = 2.0 mg/mouse) at the time points of 0.25, 0.5, 1 and 2 h post injection. Values of signal intensity in the cystic wall of endometriotic lesion on T<sub>2</sub>WI at each time point were measured and recorded.

#### Histological analysis and quantification of Fe in the ectopic uterine tissue (EUT)

Four mice (four weeks after surgery) with HA-Fe<sub>3</sub>O<sub>4</sub> NPs (Fe mass = 2.0 mg) intravenously delivered *via* the tail vein were euthanized at the time points of 0.25, 0.5, 1 and 2 h. When the abdominal cavity was exposed, the induced endometriotic lesions were carefully examined and excised. The largest lesion was assessed with a calliper. The eutopic uterine and the largest EUTs were stripped and cut into 10 cm-length segments, respectively. Tissues were then fixed in buffered formalin, and cut in 5 mm thick sections. For histology analysis, tissues were stained with haematoxylin and eosin (HE) and Prussian blue. In order to quantify Fe concentration in the EUTs, the extracted EUTs were weighed. After being digested by aqua regia (nitric acid/hydrochloric acid, v/v = 1:3) for 2 days, the Fe content in EUTs was determined by ICP-OES. The EUTs in mouse without intravenous injection of HA-Fe<sub>3</sub>O<sub>4</sub> NPs were used as control.

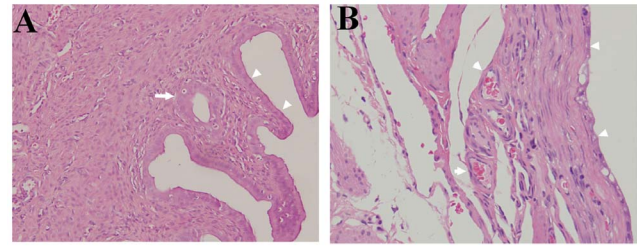

**Figure 4. Haematoxylin and eosin staining of endometrium (original magnification, 200×).** (A) eutopic endometrium. (B) ectopic endometrium. The glandular tissue (arrow) was obviously observed in eutopic endometrium (A). In ectopic endometrium(B), the neovascularization (arrow) was observed under the columnar epithelial cells (arrowhead).  
doi:10.1371/journal.pone.0094718.g004

#### Statistical Analysis

Quantitative data were expressed as mean ± standard deviation (SD). Means were compared using Student's t-test. P values <0.05 were considered statistically significant.

#### Results

##### Synthesis and characterization of HA-Fe<sub>3</sub>O<sub>4</sub> NPs

The HA-Fe<sub>3</sub>O<sub>4</sub> NPs were synthesized and characterized according to our previous work [21]. The morphology of the formed HA-Fe<sub>3</sub>O<sub>4</sub> NPs was characterized with TEM (Figure 1). It can be clearly seen that the particles with a spherical or quasi-spherical shape have a quite uniform size distribution and the polymer shell on the outer surface of the NPs can be clearly seen. As contrast agents for MR imaging, the T<sub>2</sub>-weighted imaging effect was also evaluated by the 3.0 T Tesla MR scanner (Figure 2). It can be seen that the NPs are able to obviously induce the decrease of MR signal intensity with the increase of Fe concentration. This result suggests that the HA-Fe<sub>3</sub>O<sub>4</sub> NPs may be used as an effective contrast agent for T<sub>2</sub> MR imaging applications.

##### The gross findings of the EUTs in mice

All surgically induced endometriotic lesions (Figure 3) were successfully performed and proven by histological analysis (Figure 4). The endometriotic lesions in experimental model appeared to have a tabular, cystic structure filled with fluids. Although the cutting endometrium flaps were fixed abutting abdominal wall, the endometriotic lesions were usually found at the peritoneal cavity when exposed. Only one largest lesion (the average long diameter was about 17.8±7.5 mm) in each of experimental model was commonly detected in the studied samples.

##### *In vivo* MR imaging of surgically induced endometriotic lesions in rats

After intravenous injection of the HA-Fe<sub>3</sub>O<sub>4</sub> NPs (1 mL in PBS, 2 mg Fe/mouse) into the experimental mice *via* the tail vein, MR scanning was performed (Figure 5). The ectopic lesions appeared as the ill defined, cystic mass with low signal on T<sub>1</sub>WI (Figure 5A). On turbo spin-echo FS-T<sub>2</sub>WI, the cystic components displayed the homogeneous high signal, whereas the cystic wall showed the low signal (Figure 5B). It was clear that the walls of EUTs MR signal for the mice injected with HA-Fe<sub>3</sub>O<sub>4</sub> NPs gradually decreased with the time post injection (Figure 5C–5F). At 2 h post injection, the particles were able to induce the highest contrast enhancement

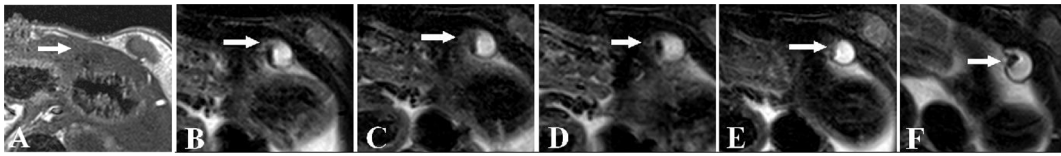

**Figure 5. MR images of the ectopic endometriotic lesions at different time points.** On T<sub>1</sub>WI, the EUTs (arrow) appeared as ill defined cystic mass with low signal (A). On axial FS-T<sub>2</sub>WI before injection (B), the EUTs appeared to have slightly high signal intensity surrounding with intermediate signals of fibrous walls. At 15 min (C), 30 min (D), 60 min (E), and 120 min (F) post injection, the wall of lesions were more clearly outlined and the lesion to background contrast was obviously improved compared with (A).  
doi:10.1371/journal.pone.0094718.g005

(Figure 5F). Owing to the anatomic structure overlap, the ectopic uterine could not be definitely indicated on both T<sub>1</sub>WI and T<sub>2</sub>WI images. Quantitative analysis of the MR T<sub>2</sub>-weighted signal intensity of the lesion wall at different time points revealed that the lesion wall had a lower signal noise ratio (SNR) value at 2 h after injection (Figure 6). T<sub>2</sub>-weighted signal intensity of the lesion wall before injection of the particles and at 0.25, 0.5, 1 and 2 h post injection were measured to be  $1341 \pm 42.9$ ,  $1069 \pm 48.4$ ,  $1018 \pm 29.4$ ,  $927 \pm 48.2$ , and  $732 \pm 25.2$ , respectively (Figure 6). The T<sub>2</sub>WI signal intensity differences between mice before injection and at 2 h post injection differed significantly ( $P = 0.000$ ).

#### Histological findings and quantitative evaluation of HA-Fe<sub>3</sub>O<sub>4</sub> NPs enhanced EUTs

HE staining results demonstrated that in EUTs, the endometrial stroma was thin and have fibrosis structure without glands and muscular layers (Figure 4B) when compared with eutopic uterine tissues (Figure 4A). Further, the newly developing vessels under the columnar epithelial cells were more obviously observed in EUTs than in eutopic uterine tissues. Quantification of Fe concentration at different time points after administration of HA-Fe<sub>3</sub>O<sub>4</sub> NPs disclosed that the accumulation of Fe in the EUTs achieved the highest concentration at 2 h post injection (Figure 7). The Prussian blue staining results demonstrated a cluster of prussian blue-positive cells scattered in and around the new blood vessels (Figure 8C) in EUTs in mouse at the time point of 2 h post injection. In contrast, little stainable iron was detected in the

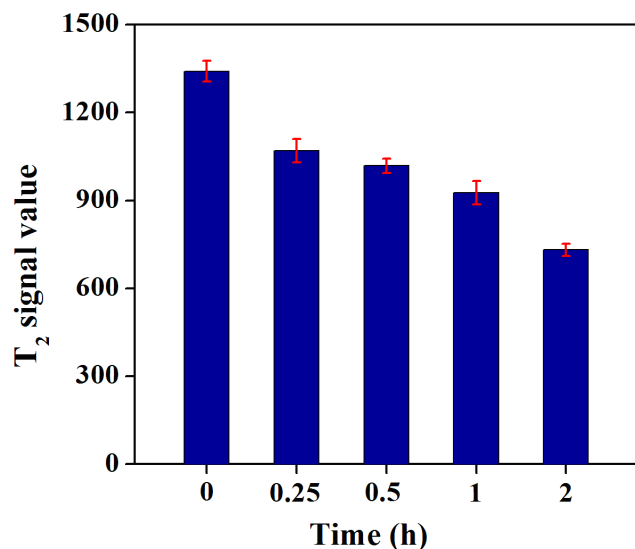

**Figure 6. T<sub>2</sub> signal intensity value of the wall of ectopic endometriotic lesions at different time points.**  
doi:10.1371/journal.pone.0094718.g006

eutopic uterine tissues (Figure 8D) in mice administrated with HA-Fe<sub>3</sub>O<sub>4</sub> NPs and mice without administration (Figures 8A and 8B).

#### Discussion

Endometriosis, especially DIE, remains a challenging condition for either clinicians or radiologists. It was reported that for deep pelvic endometriosis, the sensitivity of MR imaging for the diagnosis of endometriosis ranged from 76% to 88% in some specific anatomic locations [22]. Some small, insidious lesions may be overlooked even by the experienced pelvic radiologists because on one hand, these lesions often appear no specific MR signals and on the other hand, the complex pelvic floor anatomical structure may obscure the underlying deep endometriotic lesions. Therefore, accurately outlining the the suspected lesions with non-invasive method always has priority before the operation.

In a previous study, Schreinemacher *et al.* reported the endometriosis detection using dynamic contrast-enhanced MR imaging with gadofosveset-trisodium as a contrast agent in a mouse model [23]. They found that the contrast agents persisted longer in endometriotic tissues due to the extensive angiogenesis in induced lesions and thus achieving enhanced MR signal intensity on T<sub>1</sub>WI image. In another study, ultrasmall superparamagnetic iron oxides (USPIO)-enhanced T<sub>2</sub>WI was used to detect the EUT with a size larger than 3 cm [24]. Large-sized endometriosis might

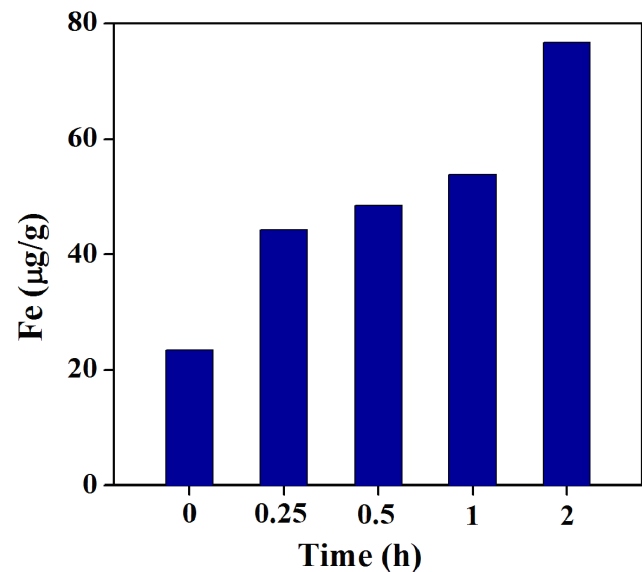

**Figure 7. Fe content in the surgically induced endometriotic lesions at different time points after intravenous injection of HA-Fe<sub>3</sub>O<sub>4</sub> NPs (2 mg Fe per mouse, in 1 mL PBS).**  
doi:10.1371/journal.pone.0094718.g007

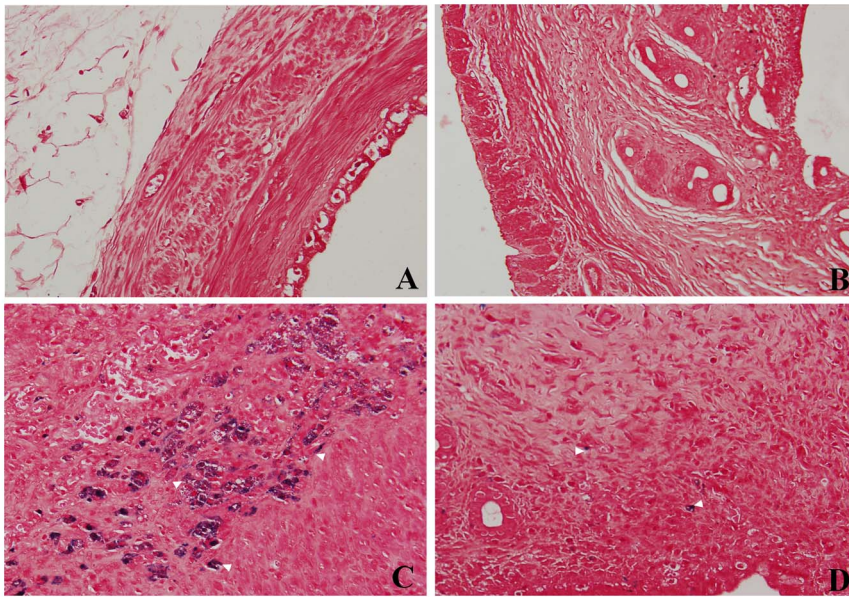

**Figure 8. Prussian blue staining of endometrium in surgically induced endometriotic rat model.** Ectopic endometrium (A), eutopic endometrium (B) sample (original magnification, 200 $\times$ ) without injection of contrast agents; and ectopic endometrium (C), eutopic endometrium (D) sample (original magnification, 400 $\times$ ) at 2 h post injection of the HA-Fe<sub>3</sub>O<sub>4</sub> NPs. Note, prussian blue staining materials (arrowhead) were obviously observed around the new vessels in ectopic endometriotic lesions (C) compared with A, B and D. doi:10.1371/journal.pone.0094718.g008

have high tissue concentrations of clumped USPIO particles, resulting in focal regions of hypointensity signal. Overall, studies focusing on the use of newly discovered contrast agents to detect the endometriosis in animal models were still extremely limited.

In this study, we reported the detection of surgically induced endometriotic lesions in rats with HA-Fe<sub>3</sub>O<sub>4</sub> NPs. Our results disclosed that HA-Fe<sub>3</sub>O<sub>4</sub> NPs intravenously delivered *via* tail vein were able to improve the conspicuity of the EUTs in rodent model.

Iron oxide nanoparticles are known to be non-toxic and eventually biodegraded to form blood hemoglobin. Fe<sub>3</sub>O<sub>4</sub> NPs with appropriate surface chemistry have been widely used for various biomedical applications including cell and protein separation, drug and gene delivery, tissue repair, hyperthermia, and MR imaging [25–29]. Various polymers such as albumin, dextran [30], dendrimers [31], polyethylene glycol (PEG) [18,32,33], or polyethyleneimine (PEI) [34] have been coated onto Fe<sub>3</sub>O<sub>4</sub> NP surfaces to improve their stability or/and decrease the uptake by the reticuloendothelial system (RES). In recent years, many kinds of multifunctional magnetic NPs with the variable synthetic structures (for example, core/shell structure) have also been reported for different biomedical applications [13].

In our previous studies, we reported the facile hydrothermal synthesis and surface functionalization of branched polyethyleneimine (PEI)-coated iron oxide nanoparticles (Fe<sub>3</sub>O<sub>4</sub>-PEI NPs) for biomedical applications, especially for MR imaging of different types of cancer [21,35]. These prior successes lead us to hypothesize that Fe<sub>3</sub>O<sub>4</sub> NPs, as a T<sub>2</sub> negative contrast agent, could also be applied in detecting endometriotic lesions which has high angiogenic activity [36]. The EUTs may be enhanced similarly with the enhanced permeability and retention (EPR) effect as in the solid tumor [35].

Surgically induced endometriotic lesions were well recorded in the literature [37]. The most experienced experimental model is the autotransplantation of uterine tissue into the peritoneal cavity in the rodent model. In this study, all surgical procedures were

successfully performed in all experimental mice. The EUTs abutting the abdominal wall always appeared to have the tubular, cystic structure filled with clear fluid. Our findings were also in line with that reported in the literature [24], where about 4 weeks after establishing the animal model, the size of EUTs seemed to be the largest lesion volume and thereafter, it varied. Histologically, the EUTs in rats contain endometrial glands and stroma, which are likely the human endometriotic lesions. In our study, the excellent lesion configuration in the T<sub>2</sub>WI may be attributed to the following reasons: Firstly, the size of the used HA-Fe<sub>3</sub>O<sub>4</sub> NPs was approximately 15.6 nm in diameter [21], which is larger than USPIO used in the literature. The demonstrated relatively high r<sub>2</sub> relaxivity of HA-Fe<sub>3</sub>O<sub>4</sub> NPs may render them to be more sensitive to magnetic susceptibility effects. Secondly, the coating of HA onto the surface of Fe<sub>3</sub>O<sub>4</sub> NPs may retain their longer blood circulation time, accordingly leading to more phagocytotic activities by endothelial cells [38–40]. Both these factors may lead to the perfect MR imaging of EUTs.

In our previous study [21], we found that after 24 h post-injection of HA-Fe<sub>3</sub>O<sub>4</sub> NPs in nude mice, the majority of the Fe was uptaken by the liver and spleen while only a quite small amount of Fe remained in the other organs, such as heart, lung, kidney and tumor. The Fe accumulation in the liver and spleen are typical due to the clearance effect of RES located in these organs [41].

Further, after the injection of the HA-Fe<sub>3</sub>O<sub>4</sub> NPs, there was a sharp contrast between negatively enhanced cystic wall and cystic components with high signals in the EUTs in T<sub>2</sub>WI, which made the lesion margin be easily recognized. Such character makes a very important clinical significance. In human endometriosis, the lesions always appear as the high signal on both T<sub>1</sub>WI and T<sub>2</sub>WI images and therefore, the T<sub>1</sub>-contrast agents may add little useful information in accurate identification of the margin for the enhanced components on T<sub>1</sub>WI may be shaded by the majority of high signals of cystic components. From this point of view, T<sub>2</sub>-

negative contrast agents may play an important role in future clinical MR imaging applications.

There were several limitations in this study. First, unlike humans, rodent animals do not shed their endometrial tissue and do not develop endometriosis spontaneously [37]. It is therefore uncertain whether the surgically induced endometriotic lesions are similar to humans. Second, the implantation, adhesion and development may be affected by the estrous level. The size of EUTs may also vary according to the estrous cycle. Under the surveillance of estrous level and at the much longer time interval, HA-Fe<sub>3</sub>O<sub>4</sub> NPs-enabled MR imaging of the EUTs may be more reasonably evaluated.

## References

- Cramer D, Missmer S (2002) The epidemiology of endometriosis. *Ann N Y Acad Sci* 955: 11–22.
- Benagiano G, Brosens I, Habiba M (2013) Structural and molecular features of the endometriosis in endometriosis and adenomyosis. *Human Reproduction Update*. doi: 10.1093/humupd/dmt052.
- Cornillie FJ OD, Lauweryns JM, Koninckx PR (1990) Deeply infiltrating pelvic endometriosis: histology and clinical significance. *Fertil Steril* 53:978–983.
- Thomassin-Naggara I, Darai E, Cuenod CA, Fournier L, Toussaint I, et al. (2009) Contribution of diffusion-weighted MR imaging for predicting benignity of complex adnexal masses. *European Radiology* 19: 1544–1552.
- Dilks P, Narayanan P, Rezek R, Sahdev A, Rockall A (2010) Can quantitative dynamic contrast-enhanced MRI independently characterize an ovarian mass? *European Radiology* 20: 2176–2183.
- Griffin N, Grant LA, Sala E (2010) Adnexal Masses: Characterization and Imaging Strategies. *Seminars in Ultrasound, CT, and MRI* 31: 330–346.
- Bazot M, Gasner A, Lafont C, Ballester M, Darai E (2011) Deep pelvic endometriosis: Limited additional diagnostic value of postcontrast in comparison with conventional MR images. *European journal of radiology* 80: e331–e339.
- Kyriazi S, Collins DJ, Messiou C, Pennert K, Davidson RL, et al. (2011) Metastatic Ovarian and Primary Peritoneal Cancer: Assessing Chemotherapy Response with Diffusion-weighted MR Imaging—Value of Histogram Analysis of Apparent Diffusion Coefficients. *Radiology* 261: 182–192.
- Togashi K, Nishimura K, Kimura I, Tsuda Y, Yamashita K, et al. (1991) Endometrial cysts: diagnosis with MR imaging. *Radiology* 180: 73–78.
- Busard MPH, Mijatovic V, van Kuijk C, Pieters-van den Bos IC, Hompes PGA, et al. (2010) Magnetic resonance imaging in the evaluation of (deep infiltrating) endometriosis: The value of diffusion-weighted imaging. *Journal of Magnetic Resonance Imaging* 31: 1117–1123.
- Kinkel K, Frei K, Balleyguier C, Chapron C (2006) Diagnosis of endometriosis with imaging: a review. *European Radiology* 16: 285–298.
- Sala E, Rockall A, Rangarajan D, Kubik-Huch RA (2010) The role of dynamic contrast-enhanced and diffusion weighted magnetic resonance imaging in the female pelvis. *European journal of radiology* 76: 367–385.
- Xu C, Sun S (2013) New forms of superparamagnetic nanoparticles for biomedical applications. *Advanced Drug Delivery Reviews* 65: 732–743.
- Gupta AK, Gupta M (2005) Synthesis and surface engineering of iron oxide nanoparticles for biomedical applications. *Biomaterials* 26: 3995–4021.
- Cai H, An X, Cui J, Li J, Wen S, et al. (2013) Facile Hydrothermal Synthesis and Surface Functionalization of Polyethyleneimine-Coated Iron Oxide Nanoparticles for Biomedical Applications. *ACS Applied Materials & Interfaces* 5: 1722–1731.
- Li J, Zheng L, Cai H, Sun W, Shen M, et al. (2013) Facile One-Pot Synthesis of Fe<sub>3</sub>O<sub>4</sub>@Au Composite Nanoparticles for Dual-Mode MR/CT Imaging Applications. *ACS Applied Materials & Interfaces* 5: 10357–10366.
- Turcheniuk K, Tarasevych AV, Kukhar VP, Boukherroub R, Szunerits S (2013) Recent advances in surface chemistry strategies for the fabrication of functional iron oxide based magnetic nanoparticles. *Nanoscale* 5: 10729–10752.
- Lee N, Choi Y, Lee Y, Park M, Moon WK, et al. (2012) Water-Dispersible Ferrimagnetic Iron Oxide Nanocubes with Extremely High r<sub>2</sub> Relaxivity for Highly Sensitive in Vivo MRI of Tumors. *Nano Letters* 12: 3127–3131.
- Xu C, Sun S (2009) Superparamagnetic nanoparticles as targeted probes for diagnostic and therapeutic applications. *Dalton Transactions*: 5583–5591.
- Lee N, Hyeon T (2012) Designed synthesis of uniformly sized iron oxide nanoparticles for efficient magnetic resonance imaging contrast agents. *Chemical Society Reviews* 41: 2575–2589.
- Li J, He Y, Sun W, Luo Y, Cai H, et al. (2014) Hyaluronic acid-modified hydrothermally synthesized iron oxide nanoparticles for targeted tumor MR imaging. *Biomaterials* 35: 3666–3677.
- Bazot M, Darai E, Hourani R, Thomassin I, Cortez A, et al. (2004) Deep Pelvic Endometriosis: MR Imaging for Diagnosis and Prediction of Extension of Disease. *Radiology* 232: 379–389.
- Schreinemacher MH, Backes WH, Slenter JM, Xanthoula S, Delvoux B, et al. (2012) Towards Endometriosis Diagnosis by Gadofosveset-Trisodium Enhanced Magnetic Resonance Imaging. *PLoS ONE* 7: e33241.
- Lee HJ, Lee HJ, Lee JM, Chang Y, Woo ST (2012) Ultrasmall superparamagnetic iron oxides enhanced MR imaging in rats with experimentally induced endometriosis. *Magnetic resonance imaging* 30: 860–868.
- McCarthy JR, Weissleder R (2008) Multifunctional magnetic nanoparticles for targeted imaging and therapy. *Advanced Drug Delivery Reviews* 60: 1241–1251.
- Wang Z, Boddington S, Wendland M, Meier R, Corot C, et al. (2008) MR imaging of ovarian tumors using folate-receptor-targeted contrast agents. *Pediatric Radiology* 38: 529–537.
- Liu HL, Sonn CH, Wu JH, Lee K-M, Kim YK (2008) Synthesis of streptavidin-FITC-conjugated core-shell Fe<sub>3</sub>O<sub>4</sub>-Au nanocrystals and their application for the purification of CD4+ lymphocytes. *Biomaterials* 29: 4003–4011.
- Pan B, Cui D, Sheng Y, Ozkan C, Gao F, et al. (2007) Dendrimer-Modified Magnetic Nanoparticles Enhance Efficiency of Gene Delivery System. *Cancer Research* 67: 8156–8163.
- Chen Y, Chen H, Zeng D, Tian Y, Chen F, et al. (2010) Core/Shell Structured Hollow Mesoporous Nanocapsules: A Potential Platform for Simultaneous Cell Imaging and Anticancer Drug Delivery. *ACS Nano* 4: 6001–6013.
- Berry CC, Wells S, Charles S, Aitchison G, Curtis ASG (2004) Cell response to dextran-derivatized iron oxide nanoparticles post internalisation. *Biomaterials* 25: 5405–5413.
- Shi X, Wang SH, Swanson SD, Ge S, Cao Z, et al. (2008) Dendrimer-Functionalized Shell-crosslinked Iron Oxide Nanoparticles for In-Vivo Magnetic Resonance Imaging of Tumors. *Advanced Materials* 20: 1671–1678.
- Larsen EKV, Nielsen T, Wittenborn T, Birkedal H, Vorup-Jensen T, et al. (2009) Size-Dependent Accumulation of PEGylated Silane-Coated Magnetic Iron Oxide Nanoparticles in Murine Tumors. *ACS Nano* 3: 1947–1951.
- Xie J, Xu C, Kohler N, Hou Y, Sun S (2007) Controlled PEGylation of Monodisperse Fe<sub>3</sub>O<sub>4</sub> Nanoparticles for Reduced Non-Specific Uptake by Macrophage Cells. *Advanced Materials* 19: 3163–3166.
- Chertok B, David AE, Yang VC (2010) Polyethyleneimine-modified iron oxide nanoparticles for brain tumor drug delivery using magnetic targeting and intracarotid administration. *Biomaterials* 31: 6317–6324.
- Li J, Zheng L, Cai H, Sun W, Shen M, et al. (2013) Polyethyleneimine-mediated synthesis of folic acid-targeted iron oxide nanoparticles for in vivo tumor MR imaging. *Biomaterials* 34: 8382–8392.
- Lebovic DI, Kir M, Casey CL (2004) Peroxisome proliferator-activated receptor-gamma induces regression of endometrial explants in a rat model of endometriosis. *Fertility and sterility* 82: 1008–1013.
- Grümmer R (2006) Animal models in endometriosis research. *Human Reproduction Update* 12: 641–649.
- Bae KH, Yoon JJ, Park TG (2006) Fabrication of Hyaluronic Acid Hydrogel Beads for Cell Encapsulation. *Biotechnology Progress* 22: 297–302.
- Jiang G, Park K, Kim J, Kim KS, Oh EJ, et al. (2008) Hyaluronic acid-polyethyleneimine conjugate for target specific intracellular delivery of siRNA. *Biopolymers* 89: 635–642.
- Kamat M, El-Boubbou K, Zhu DC, Lansdell T, Lu X, et al. (2010) Hyaluronic Acid Immobilized Magnetic Nanoparticles for Active Targeting and Imaging of Macrophages. *Bioconjugate Chemistry* 21: 2128–2135.
- Kumar R, Roy I, Ohulchanskyy TY, Vathy LA, Bergey EJ, et al. (2010) In Vivo Biodistribution and Clearance Studies Using Multimodal Organically Modified Silica Nanoparticles. *ACS Nano* 4: 699–708.

## Conclusion

By using the HA-Fe<sub>3</sub>O<sub>4</sub> NPs, the surgically induced endometriosis lesion in rats can be clearly outlined. HA-Fe<sub>3</sub>O<sub>4</sub> NPs may be used as negative contrast agents for sensitively detecting of endometriosis and be applied for future hyperthermia treatment of endometriosis.

## Author Contributions

Conceived and designed the experiments: HZ GZ MS XS. Performed the experiments: HZ JL WS YH. Analyzed the data: HZ JL. Contributed reagents/materials/analysis tools: HZ JL WS YH. Wrote the paper: HZ JL. Revised the paper: XS.
